# Supplementary material for: Mixed-valence Cu-based heterostructures for efficient electrochemical nitrate reduction to ammonia
Source: Royal Society of Chemistry journal article supplement (doi:10.1039/d3dt03849a), 2023-12-15
Supplement: d3dt03849a1.pdf [file d3dt03849a1.pdf]

# Mixed-valence Cu-based Heterostructure for Efficient Electrochemical Nitrate Reduction to Ammonia

Jingrui Ye, Yilin Yang, Mengjuan Teng, An Wang, Jiawei Xia, Guangyu He\* and  
Haiqun Chen\*

## Determination of ion concentrations

The ultraviolet-visible (UV-Vis) spectrophotometer was employed to analyze the concentrations of  $\text{NO}_3^-$ -N,  $\text{NO}_2^-$ -N, and  $\text{NH}_4^+$ -N, the corresponding concentration-absorbance curves were shown in Figure S1, S2 and S3.

### Determination of $\text{NO}_3^-$ -N

The concentration of  $\text{NO}_3^-$ -N in electrolyte was determined before and after chronoamperometry tests. Specifically, 1 M HCl (0.1 mL) and 0.8 wt.% sulfamic acid solution (0.01 mL) were added to the diluted electrolyte. UV-Vis spectrophotometer was employed to record absorption spectrum and the absorbance intensities at wavelength of 220 and 275 nm were used to determine the concentration of  $\text{NO}_3^-$ -N ( $A = A_{220\text{nm}} - 2A_{275\text{nm}}$ ). The concentration-absorbance standard curve was calibrated by using various  $\text{KNO}_3$  aqueous solutions as the standard samples in the same operation.

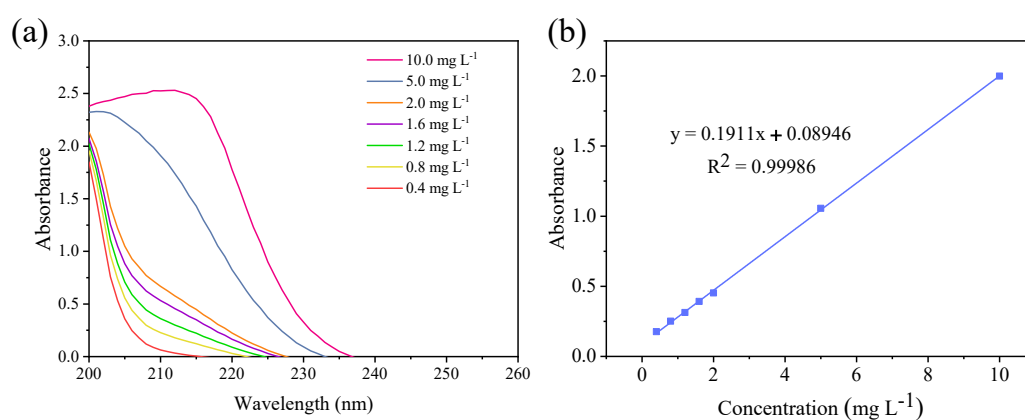

Fig. S1 UV-Vis curves and concentration-absorbance calibration curves of  $\text{NO}_3^-$ -N

### Determination of $\text{NO}_2^-$ -N

The concentration of  $\text{NO}_2^-$ -N in electrolyte was determined by Griess test according to the literature. The absorbance intensity at a wavelength of 540 nm in UV-Vis spectrum was recorded to determine the concentration of  $\text{NO}_2^-$ -N. The concentration-absorbance standard curve was calibrated by using various  $\text{NaNO}_2$  aqueous solutions as the standard samples in the same operation.

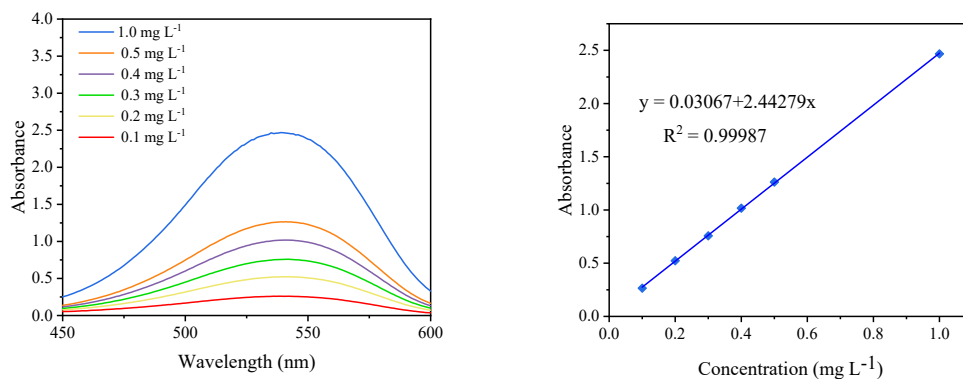

Fig. S2 UV-Vis curves and concentration-absorbance calibration curves of  $\text{NO}_2^-$ -N

### Determination of $\text{NH}_4^+$

The concentration of generated  $\text{NH}_3$  was determined by quantitative detection of  $\text{NH}_4^+$  in electrolyte using the indophenol blue (IB) method. In this method,  $\text{NH}_4^+$  reacts with phenols and hypochlorite ( $\text{ClO}^-$ ) in a strongly alkaline medium to form IB, with nitroprusside acting as a catalyst. Specifically, 14.1 g of phenol and 163 mg of sodium nitroprusside ( $\text{Na}[\text{Fe}(\text{NO})(\text{CN})_5]$ ) were mixed and diluted to 1L with water, which was marked as solution A. 5.2 g of  $\text{NaOH}$  and 3.07 mL of  $\text{NaClO}$  were mixed and diluted to 1L with water, which was marked as solution B. To determine the concentration of  $\text{NH}_4^+$ , 2.5 mL of solution A and 2.5 mL of solution B were added to 1.0 mL of diluted electrolyte. The absorbance intensity at a wavelength of 623 nm in UV-Vis spectrum was recorded. The concentration-absorbance standard curve was calibrated by using various ammonium chloride solutions as the standard samples in the same operation.

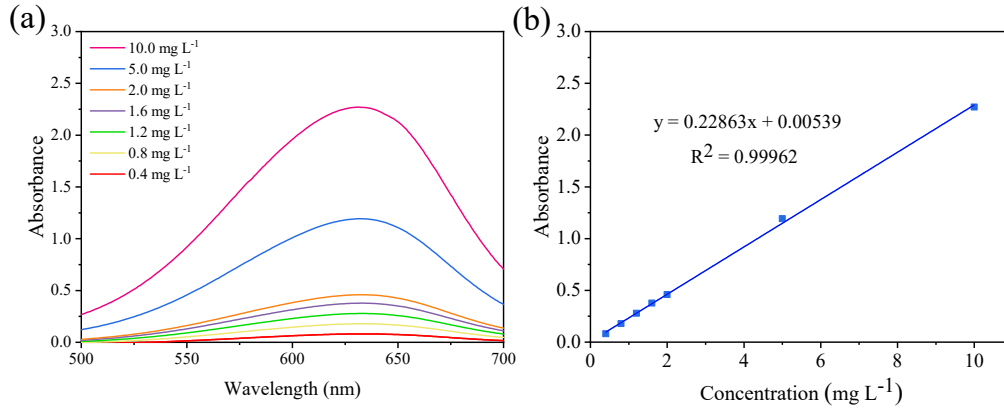

Fig. S3 UV-Vis curves and concentration-absorbance calibration curves of  $\text{NH}_4^+\text{-N}$

### Calculations

The  $\text{NO}_3^-$  removal efficiency ( $R(\text{NO}_3^- \text{-N})$ ),  $\text{NO}_2^- \text{-N}$  selectivity ( $S(\text{NO}_2^- \text{-N})$ ),  $\text{NH}_4^+ \text{-N}$  selectivity ( $S(\text{NH}_4^+ \text{-N})$ ), selectivity of other product ( $S(\text{others})$ ), yield rate and Faraday efficiency of ammonia ( $FE$ ) were calculated by following equations:

$$R(\text{NO}_3^-) = \frac{C_0 (\text{NO}_3^- - \text{N}) - C_t (\text{NO}_3^- - \text{N})}{C_0 (\text{NO}_3^- - \text{N})} \times 100\%$$

$$S(\text{NO}_2^-) = \frac{C_t (\text{NO}_2^- - \text{N})}{C_0 (\text{NO}_3^- - \text{N}) - C_t (\text{NO}_3^- - \text{N})} \times 100\%$$

$$S(\text{NH}_4^+) = \frac{C_t (\text{NH}_4^+ - \text{N})}{C_0 (\text{NO}_3^- - \text{N}) - C_t (\text{NO}_3^- - \text{N})} \times 100\%$$

$$S(\text{others}) = \frac{C_0 (\text{NO}_3^- - \text{N}) - C_t (\text{NO}_3^- - \text{N}) - C_t (\text{NO}_2^- - \text{N}) - C_t (\text{NH}_4^+ - \text{N})}{C_0 (\text{NO}_3^- - \text{N}) - C_t (\text{NO}_3^- - \text{N})} \times 100\%$$

$$\text{Yield} = \frac{C_t (\text{NH}_4^+ - \text{N}) \times V}{t \times A \times M_N} \times 10^{-3}$$

$$FE = \frac{8 \times F \times C_t (\text{NH}_4^+ - \text{N}) \times V \times 10^{-6}}{M_N \times Q} \times 100\%$$

Where  $C_0(NO_3^- - N)$  represents the initial concentration of  $NO_3^- - N$ .  $C_t(NO_3^- - N)$ ,  $C_t(NO_2^- - N)$ , and  $C_t(NH_4^+ - N)$  represent the measured concentration of  $NO_3^- - N$ ,  $NO_2^- - N$ , and  $NH_4^+ - N$  at reaction time  $t$  (h), respectively,  $V$  is the electrolyte volume in the cathode chamber (35 mL),  $A$  is the geometric area of the electrode (1.0 cm<sup>2</sup>),  $M_N$  is the molar mass of N,  $F$  is the Faraday constant (96 485 C mol<sup>-1</sup>), and  $Q$  is the total charge during electrolysis.

The electrochemical surface area (ECSA) was calculated by followed equation:

$$C_{dl} = \frac{I_c}{v}$$

$$ECSA = \frac{C_{dl}}{C_s}$$

where  $C_{dl}$  is capacitance of double layer of electrode determined by CVs at different scan rates,  $I_c$  is current in CV,  $v$  is scan rate. Specifically,  $C_{dl}$  was estimated by plotting the difference of cathode and anode current density to scanning rate, where the slope is twice that of  $C_{dl}$ .  $C_s$  is the ideal specific capacitance and use general value in alkaline solutions (40 μF cm<sup>-2</sup> per cm<sub>ECSA</sub>).

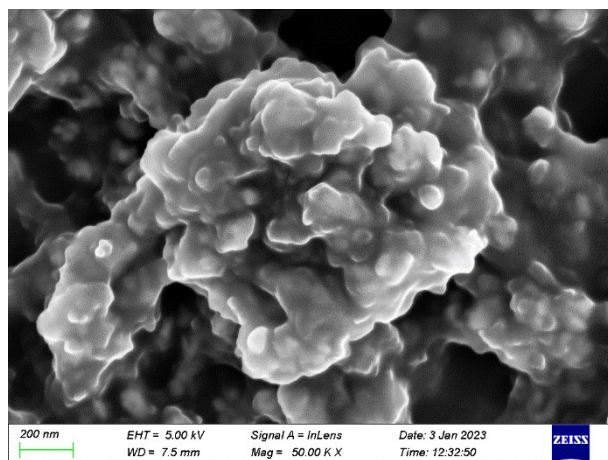

Fig. S4 SEM image of Cu-Cu<sub>x</sub>O/C

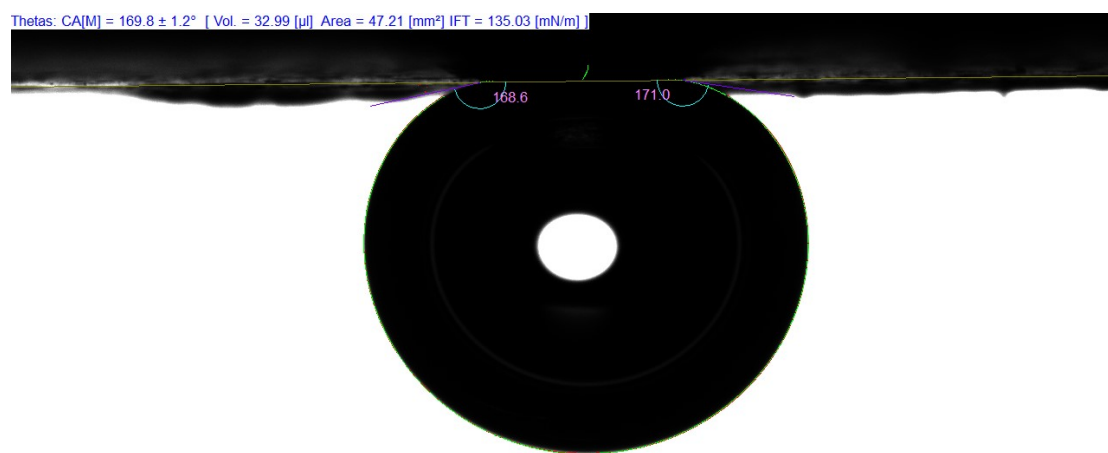

Fig. S5 The contact angle of Cu-Cu<sub>x</sub>O/C-0.3

**Table S1 The atomic ratios of  $[(\text{Cu}^0 + \text{Cu}^+)/\text{Cu}^{2+}]$  of Cu-Cu<sub>x</sub>O/C, Cu-Cu<sub>x</sub>O/C-0.1, Cu-Cu<sub>x</sub>O/C-0.3 and Cu-Cu<sub>x</sub>O/-0.5 catalysts**

| Catalyst                   | $(\text{Cu}^0 + \text{Cu}^+)/\text{Cu}^{2+}$ |
|----------------------------|----------------------------------------------|
| Cu-Cu <sub>x</sub> O/C     | 0.14                                         |
| Cu-Cu <sub>x</sub> O/C-0.1 | 0.36                                         |
| Cu-Cu <sub>x</sub> O/C-0.3 | 2.60                                         |
| Cu-Cu <sub>x</sub> O/C-0.5 | 0.33                                         |

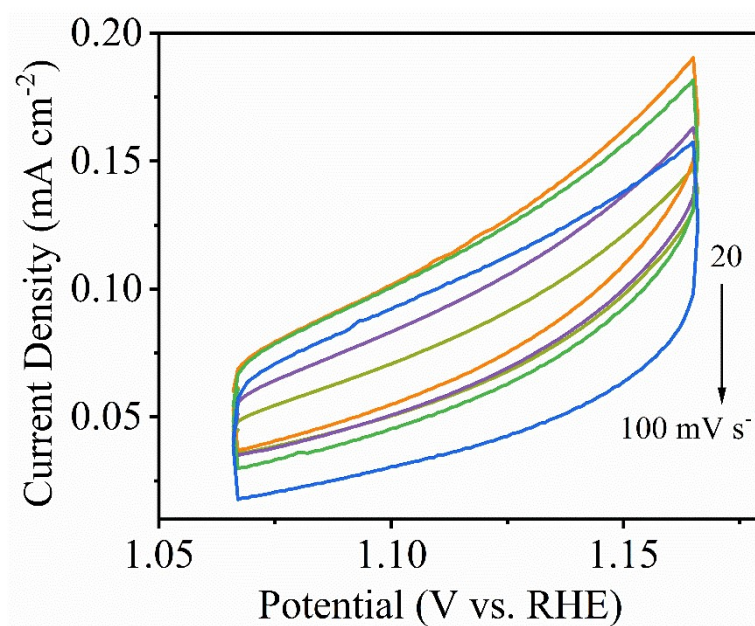

Fig. S6 CV curves of Cu-Cu<sub>x</sub>O/C under the scan rates of 20~100 mV s<sup>-1</sup> at 1 M KOH with 0.1 M NO<sub>3</sub><sup>-</sup>

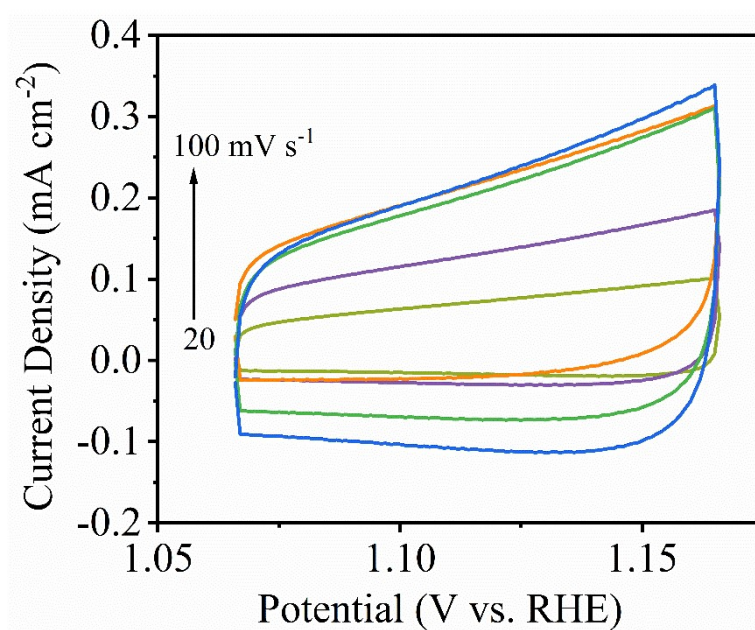

Fig. S7 CV curves of Cu-Cu<sub>x</sub>O/C-0.1 under the scan rates of 20~100 mV s<sup>-1</sup> at 1 M KOH with 0.1 M NO<sub>3</sub><sup>-</sup>



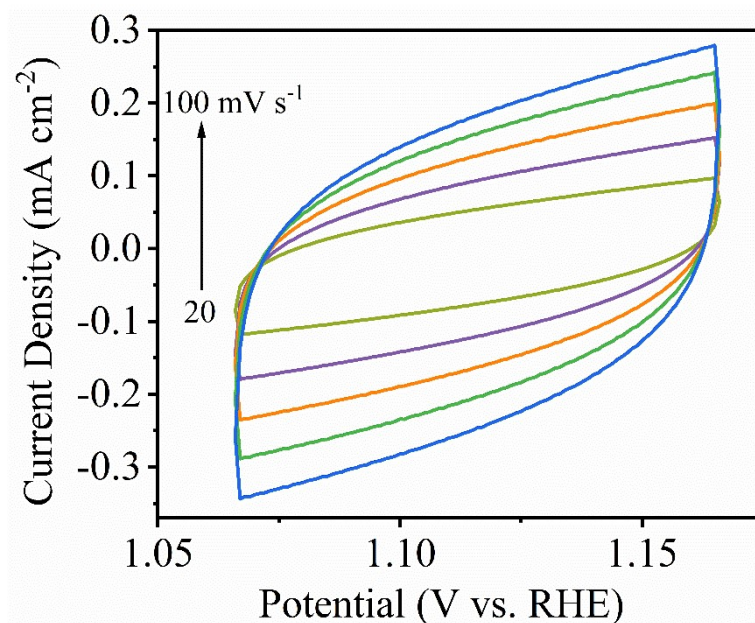

Fig. S8 CV curves of Cu-Cu<sub>x</sub>O/C-0.3 under the scan rates of 20~100 mV s<sup>-1</sup> at 1 M KOH with 0.1 M NO<sub>3</sub><sup>-</sup>

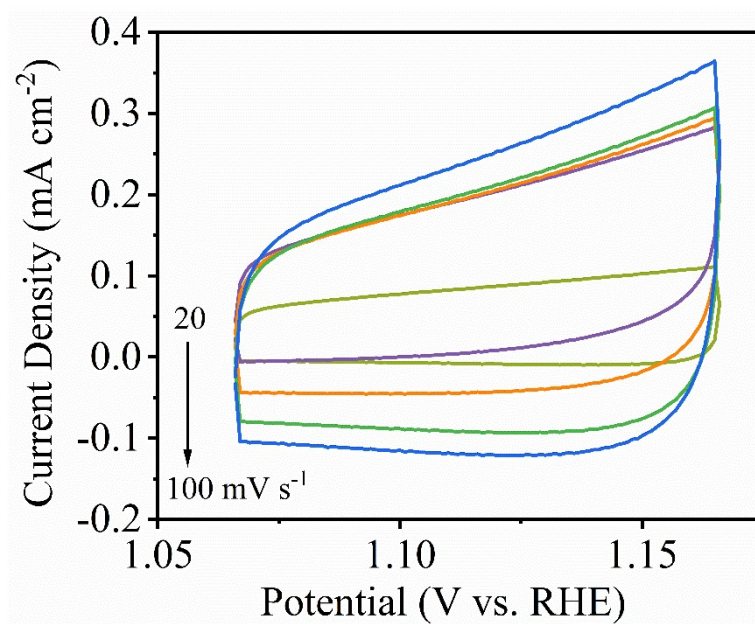

Fig. S9 CV curves of Cu-Cu<sub>x</sub>O/C-0.5 under the scan rates of 20~100 mV s<sup>-1</sup> at 1 M KOH with 0.1 M NO<sub>3</sub><sup>-</sup>

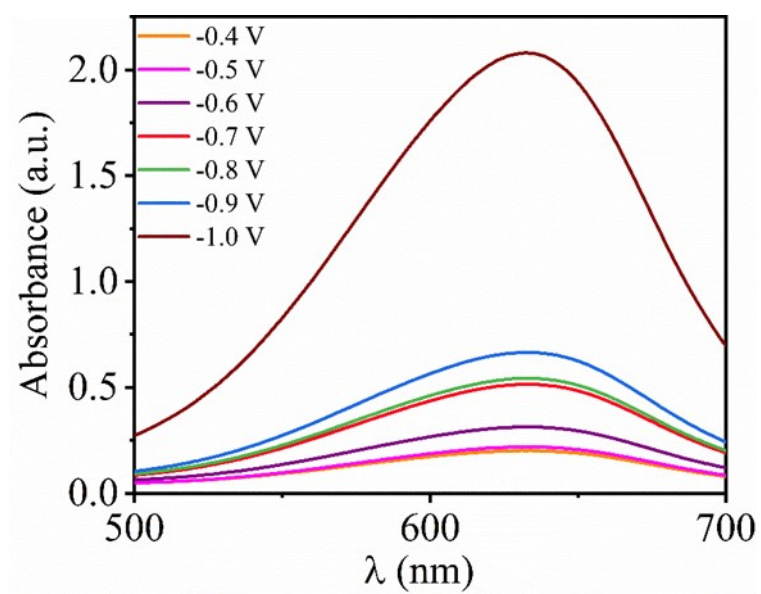

Fig. S10 UV spectra of Cu-Cu<sub>x</sub>O/C-0.3

**Table S2 The detailed comparison of NO<sub>3</sub>RR performance of recently reported Cu-based catalysts and Cu<sub>2</sub>S-CuO/NC**

| Catalysts                               | Yield rate                                                                                                                    | FE          | Electrolyte                                                                                      | Potential       | Ref.      |
|-----------------------------------------|-------------------------------------------------------------------------------------------------------------------------------|-------------|--------------------------------------------------------------------------------------------------|-----------------|-----------|
| Co <sub>3</sub> O <sub>4</sub> /Cu      | 684 $\mu\text{g mg}_{\text{cat.}}^{-1} \text{h}^{-1}$                                                                         | 94.60%      | 0.4 M Na <sub>2</sub> SO <sub>4</sub> with 50 mg L <sup>-1</sup> NO <sub>3</sub> <sup>-</sup> -N | -0.4 V vs. RHE  | [1]       |
| CuO@PANI/C F                            | 0.213 mmol h <sup>-1</sup>                                                                                                    | 93.88%      | 0.5 M K <sub>2</sub> SO <sub>4</sub> with 200 ppm NO <sub>3</sub> <sup>-</sup> -N                | -0.95 V vs. SCE | [2]       |
| CuCo <sub>2</sub> O <sub>4</sub> /CFs   | 394.5 mmol h <sup>-1</sup> g <sup>-1</sup>                                                                                    | 81.90%      | 1 M KOH with 0.1 M NO <sub>3</sub> <sup>-</sup>                                                  | -0.3 V vs. RHE  | [3]       |
| Cu@Cu <sub>2+1</sub> O NWs              | 576.53 $\mu\text{g h}^{-1} \text{mg}_{\text{cat.}}^{-1}$                                                                      | 87.07%      | 0.5 M K <sub>2</sub> SO <sub>4</sub> with 50 mg L <sup>-1</sup> KNO <sub>3</sub>                 | -1.2 V vs. SCE  | [4]       |
| TiO <sub>2</sub> NTs/CuO                | 1241.81 $\mu\text{g h}^{-1} \text{cm}^{-2}$                                                                                   | 92.23%      | 0.5 M Na <sub>2</sub> SO <sub>4</sub> with 100 ppm KNO <sub>3</sub> -N                           | -0.75 V vs. RHE | [5]       |
| Cu nanosheets                           | 1.41 mmol h <sup>-1</sup> cm <sup>-2</sup>                                                                                    | >80 %       | 1 M KOH with 0.2 M KNO <sub>3</sub> solution                                                     | -0.59 V vs. RHE | [6]       |
| Cu/Pd/CuO <sub>x</sub> heterostructures | 1510.3 $\mu\text{g h}^{-1} \text{mg}_{\text{cat.}}^{-1}$                                                                      | 84.04%      | 0.5 M K <sub>2</sub> SO <sub>4</sub> with 50 mg L <sup>-1</sup> KNO <sub>3</sub> -N              | -1.3 V vs. SCE  | [7]       |
| Cu/MnO <sub>x</sub> Hybrids             | 29.3 mg h <sup>-1</sup> mgcat. <sup>-1</sup>                                                                                  | 86.20%      | 0.1 M Na <sub>2</sub> SO <sub>4</sub> with 100 mM KNO <sub>3</sub>                               | -0.6 V vs. RHE  | [8]       |
| Cu/MnO <sub>x</sub> Hybrids             | 5.53 mg h <sup>-1</sup> mgcat. <sup>-1</sup>                                                                                  | 98.20%      | 0.1 M Na <sub>2</sub> SO <sub>4</sub> with 10 mM KNO <sub>3</sub>                                | -0.7 V vs. RHE  | [9]       |
| Cu-N-C SAC                              | 4.5 mg cm <sup>-2</sup> h <sup>-1</sup><br>(12.5 mol <sub>NH3</sub> g <sub>Cu</sub> <sup>-1</sup> h <sup>-1</sup> )           | 84.70%      | 0.1 M KOH with 0.1 M KNO <sub>3</sub>                                                            | -1.00 V vs. RHE | [10]      |
| Cu <sub>2</sub> O                       | 0.0699 mmol h <sup>-1</sup> mg <sup>-1</sup>                                                                                  | 85.26%      | 0.5 M sodium sulfate with 200 ppm nitrate                                                        | -1.2 V vs. RHE  | [11]      |
| oxide-derived Cu                        | 1.1 mmol h <sup>-1</sup> cm <sup>-2</sup>                                                                                     | 92%         | 1 M KOH with 100 mM NO <sub>3</sub> <sup>-</sup>                                                 | -0.15 V vs. RHE | [12]      |
| Cu <sub>50</sub> Ni <sub>50</sub>       | 583.6 ± 2.4 $\mu\text{mol cm}^{-2} \text{h}^{-1}$                                                                             | 88.0 ± 1.6% | 1 M KOH with 100 mM KNO <sub>3</sub>                                                             | -1.2 V vs. RHE  | [13]      |
| Ru@C <sub>3</sub> N <sub>4</sub> /Cu    | 0.249 mmol h <sup>-1</sup> cm <sup>-2</sup>                                                                                   | -           | 0.5 M Na <sub>2</sub> SO <sub>4</sub> with NO <sub>3</sub> <sup>-</sup>                          | -0.9 V vs. RHE  | [14]      |
| Cu-Cu <sub>x</sub> O/C-0.3              | 13.38 mg <sub>NH3-N</sub> cm <sup>-2</sup> h <sup>-1</sup><br>(ca. 2.39 mol g <sub>cat.</sub> <sup>-1</sup> h <sup>-1</sup> ) | 81.4%       | 1 M KOH with 100 mM KNO <sub>3</sub>                                                             | -0.8 V vs. RHE  | This work |
| Cu-Cu <sub>x</sub> O/C-0.3              | 17.64 mg <sub>NH3-N</sub> cm <sup>-2</sup> h <sup>-1</sup><br>(ca. 3.15 mol g <sub>cat.</sub> <sup>-1</sup> h <sup>-1</sup> ) | 79.9%       | 1 M KOH with 100 mM KNO <sub>3</sub>                                                             | -1.0 V vs. RHE  | This work |

## References

- [1] W. Fu, Z. Hu, Y. Du, P. Su, Y. Su, Q. Zhang, M. Zhou, Building dual active sites Co<sub>3</sub>O<sub>4</sub>/Cu electrode

- to break scaling relations for enhancement of electrochemical reduction of nitrate to high-value ammonia, *J. Hazard. Mater.* 434 (2022) 128887, <https://doi.org/10.1016/j.jhazmat.2022.128887>.
- [2] Y. Xu, Y. Wen, T. Ren, H. Yu, K. Deng, Z. Wang, X. Li, L. Wang, H. Wang, Engineering the surface chemical microenvironment over CuO nanowire arrays by polyaniline modification for efficient ammonia electrosynthesis from nitrate, *Appl. Catal. B: Environ.* 320 (2023) 121981, <https://doi.org/10.1016/j.apcatb.2022.121981>.
- [3] Z. Niu, S. Fan, X. Li, P. Wang, Z. Liu, J. Wang, C. Bai, D. Zhang, Bifunctional copper-cobalt spinel electrocatalysts for efficient tandem-like nitrate reduction to ammonia, *Chem. Eng. J.* 450 (2022) 138343, <https://doi.org/10.1016/j.cej.2022.138343>.
- [4] T. Ren, K. Ren, M. Wang, M. Liu, Z. Wang, H. Wang, X. Li, L. Wang, Y. Xu, Concave-convex surface oxide layers over copper nanowires boost electrochemical nitrate-to-ammonia conversion, *Chem. Eng. J.* 426 (2021) 130759, <https://doi.org/10.1016/j.cej.2021.130759>.
- [5] W. Qiu, X. Chen, Y. Liu, D. Xiao, P. Wang, R. Li, K. Liu, Z. Jin, P. Li, Confining intermediates within a catalytic nanoreactor facilitates nitrate-to-ammonia electrosynthesis, *Appl. Catal. B: Environ.* 315 (2022) 121548, <https://doi.org/10.1016/j.apcatb.2022.121548>.
- [6] Y. Fu, S. Wang, Y. Wang, P. Wei, J. Shao, T. Liu, G. Wang, X. Bao, Enhancing Electrochemical Nitrate Reduction to Ammonia over Cu Nanosheets via Facet Tandem Catalysis, *Angew. Chem. Int. Ed.* 62 (26) (2023) e202303327, <https://doi.org/10.1002/anie.202303327>.
- [7] T. Ren, Z. Yu, H. Yu, K. Deng, Z. Wang, X. Li, H. Wang, L. Wang, Y. Xu, Interfacial polarization in metal-organic framework reconstructed Cu/Pd/CuO<sub>x</sub> multi-phase heterostructures for electrocatalytic nitrate reduction to ammonia, *Appl. Catal. B: Environ.* 318 (2022) 121805, <https://doi.org/10.1016/j.apcatb.2022.121805>.
- [8] Y. Cui, A. Dong, Y. Zhou, Y. Qu, M. Zhao, Z. Wang, Q. Jiang, Interfacially engineered nanoporous Cu/MnO<sub>x</sub> hybrids for highly efficient electrochemical ammonia synthesis via nitrate reduction, *Small* 19 (17) (2023) 2207661, <https://doi.org/10.1002/sml.202207661>.
- [9] J. Yang, H. Qi, A. Li, X. Liu, X. Yang, S. Zhang, Q. Zhao, Q. Jiang, Y. Su, L. Zhang, J. Li, Z. Tian, W. Liu, A. Wang, T. Zhang, Potential-Driven restructuring of Cu single atoms to nanoparticles for boosting the electrochemical reduction of nitrate to ammonia, *J. Am. Chem. Soc.* 144 (27) (2022) 12062-12071, <https://doi.org/10.1021/jacs.2c02262>.
- [10] Z. Gong, W. Zhong, Z. He, Q. Liu, H. Chen, D. Zhou, N. Zhang, X. Kang, Y. Chen, Regulating

- surface oxygen species on copper (I) oxides via plasma treatment for effective reduction of nitrate to ammonia, *Appl. Catal. B: Environ.* 305 (2022) 121021, <https://doi.org/10.1016/j.apcatb.2021.121021>.
- [11] J. Yuan, Z. Xing, Y. Tang, C. Liu, Tuning the oxidation state of Cu electrodes for selective electrosynthesis of ammonia from nitrate, *ACS Appl. Mater. Inter.* 13 (44) (2021) 52469-52478, <https://doi.org/10.1021/acsami.1c10946>.
- [12] Y. Bu, C. Wang, W. Zhang, X. Yang, J. Ding, G. Gao, Electrical Pulse-Driven periodic Self-Repair of Cu-Ni tandem catalyst for efficient ammonia synthesis from nitrate, *Angew. Chem. Int. Ed.* 62 (24) (2023) e202217337, <https://doi.org/10.1002/anie.202217337>.
- [13] Y. Zheng, M. Qin, X. Yu, H. Yao, W. Zhang, G. Xie, X. Guo, Constructing  $\text{Ru}@C_3N_4/\text{Cu}$  tandem electrocatalyst with Dual-Active sites for enhanced nitrate electroreduction to ammonia, *Small* 19 (30) (2023) 2302266, <https://doi.org/10.1002/smll.202302266>.
